# Supplementary material for: Superpositioning of Deletions Promotes Growth of Escherichia coli with a Reduced Genome
Source: PubMed Central journal article supplement — DNA Res. 2008 Aug 27;15(5):277–84. doi: 10.1093/dnares/dsn019 (PMC2575892; doi:10.1093/dnares/dsn019), 2008-08-27

## Supplemental Materials

### Materials and Methods

#### Strategy for genome reduction

Single-deletion strains as to each candidate region were prepared by the markerless deletion method (Supplemental Table 1). The method consists of two recombination events stimulated by  $\lambda$  Red recombinase (Supplemental Figure 1). For the first recombination a target region was replaced with a marker cassette (SC fragment) to make a SC deletion strain, and for the second one, the marker cassette was eliminated to make a PO deletion strain (Supplemental Figure 1). The SC fragment included the chloramphenicol resistant gene (*cat*) and a negative selection marker (*Bacillus subtilis sacB*). Since *sacB* makes *E. coli* sensitive to sucrose, a markerless deletion strain (a PO deletion strain) was successfully selected using its sucrose-resistant phenotype without the negative selection marker, *sacB* (Supplemental Figure 1). This method takes one week per one markerless deletion. The obtained deletion strains and the results of growth tests are summarized in Supplemental Table 1. Initial regions selected for deletion numbered 103. Among them, ten initial designs were shortened (altered designs are indicated by “\*” in Supplemental Table 1) to obtain deletion strains. Finally, 102 deletion mutants were actually obtained, which included 84 showing normal growth in M9 minimal medium like the parental strain W3110red. Deletions located within 50 kbp were integrated in a single genome through multiple rounds of markerless deletions of targeting regions (Supplemental Table 2). All single-deletion and deletion-unit strains were strictly assessed for growth in M9 minimal medium. Regions which did not affect growth were

used to construct multiple deletion strains. The growth test conditions were as follows: Fifty- $\mu$ l seed culture was inoculated into a test tube containing 5-ml M9 minimal medium. The cultivation conditions were 37°C and 250 rpm. Two hundred- $\mu$ l culture was diluted with 1.8-ml 0.1 N HCl, and then the optical density at 660 nm ( $OD_{660}$ ) was measured at 6, 10, 13, 16, 19 and 32 hours to evaluate growth.

#### Construction of an *E. coli* cell with a reduced genome

Three new single deletions or deletion-units were transduced using the P1 phage from the original deletion mutants to the recipient strains in order to accumulate new deletions. A single deletion strain or a deletion-unit strain with the SC marker cassette was integrated into a recipient strain. Mutants with an additional deletion were selected as to their chloramphenicol-resistance, and the marker cassette was eliminated by sucrose-resistance. A family tree of deletion strains is shown in Supplemental Figure 2. Strains 22stepA, B, and C hardly accepted an additional deletion. The main reason of incompetence for further deletion was  $\Delta$ 043. So the  $\Delta$ 043 region was reverted to the wild type. Finally, 53 deletions were combined in one strain via 28 cycles of deletion-transfer (Figure 1). The resultant strain was designated as MGF-01. The composition of reduced genome *E. coli* is shown in Supplementary Table 3.

#### **Supplemental Figure Legends**

Supplemental Figure 1. Schematic illustration of the two-step markerless deletion method.

In the first recombination, a target region is replaced and deleted by the SC fragment. Deletion mutants were selected as chloramphenicol-resistant transformants and further checked as to sucrose-sensitive phenotype. In the second recombination, the inserted SC fragment is replaced and deleted by the PO fragment. Markerless deletion mutants were selected as sucrose-resistant transformants and further checked as to chloramphenicol-sensitive (Cm<sup>S</sup>) phenotype.

Supplemental Figure 2. Lineage of strain MGF-01. A deletion unit (unit A to T in Table 2) or a single deletion ( $\Delta$ 001 to  $\Delta$ 109 in Table 1) was integrated into a proximate strain linked by a line. The names of the resulting strains are indicated below the names of the newly integrated deletion units or single deletions. Strains directly linked to MGF-01 are indicated in bold letters.

# Supplemental Table 1. Single deletion strains.

| deletion name <sup>a</sup> | left    | right   | length | c bne <sup>b</sup> | growth <sup>c</sup> | integrated in MGF-01 <sup>d</sup> | deletion name <sup>a</sup> | left    | right   | length | c bne <sup>b</sup> | growth <sup>c</sup> | integrated in MGF-01 <sup>d</sup> | deletion name <sup>a</sup> | left    | right   | length | c bne <sup>b</sup> | growth <sup>c</sup> | integrated in MGF-01 <sup>d</sup> |   |
|----------------------------|---------|---------|--------|--------------------|---------------------|-----------------------------------|----------------------------|---------|---------|--------|--------------------|---------------------|-----------------------------------|----------------------------|---------|---------|--------|--------------------|---------------------|-----------------------------------|---|
| Δ 101                      | 15035   | 20289   | 5255   |                    | -                   |                                   | Δ 031                      | 1719063 | 1729955 | 10893  |                    | -                   |                                   | Δ 055                      | 3109246 | 3133479 | 24234  |                    | -                   |                                   | ○ |
| Δ 101*                     | 19460   | 20289   | 830    |                    |                     |                                   | Δ 031*                     | 1722176 | 1729955 | 7780   |                    |                     |                                   | Δ 056                      | 3164770 | 3172081 | 7312   |                    | -                   |                                   | ○ |
| Δ 102                      | 71935   | 77094   | 5160   |                    |                     |                                   | Δ 105                      | 1797915 | 1800238 | 2324   |                    |                     |                                   | Δ 057                      | 3174759 | 3182375 | 7617   | -                  |                     |                                   |   |
| Δ 103                      | 167065  | 172979  | 5915   |                    |                     | ○                                 | Δ 032                      | 1818151 | 1823955 | 5805   |                    |                     |                                   | Δ 058                      | 3183306 | 3193120 | 9815   | -                  |                     |                                   |   |
| Δ 001                      | 244301  | 253746  | 9446   |                    |                     | ○                                 | Δ 033                      | 1825151 | 1843865 | 18715  |                    | -                   |                                   | Δ 059                      | 3220176 | 3258311 | 38136  |                    |                     |                                   |   |
| Δ 002                      | 262300  | 387867  | 125568 |                    |                     | ○                                 | Δ 034                      | 1867443 | 1888554 | 21112  |                    |                     |                                   | Δ 060                      | 3271481 | 3304307 | 32827  | -                  |                     |                                   |   |
| Δ 007                      | 389475  | 404039  | 14565  |                    |                     | ○                                 | Δ 092                      | 1903746 | 1907820 | 4075   |                    |                     |                                   | Δ 060*                     | 3271481 | 3298004 | 26524  |                    |                     |                                   |   |
| Δ 008                      | 471822  | 490480  | 18659  | -                  |                     |                                   | Δ 035                      | 1916543 | 1927807 | 11265  |                    | -                   |                                   | Δ 061                      | 3336821 | 3344521 | 7701   | -                  |                     |                                   |   |
| Δ 009                      | 518366  | 533047  | 14682  |                    |                     | ○                                 | Δ 035*                     | 1916543 | 1926625 | 10083  |                    | -                   |                                   | Δ 062                      | 3361081 | 3370891 | 9811   |                    |                     |                                   | ○ |
| Δ 010                      | 535841  | 550551  | 14711  |                    |                     | ○                                 | Δ 036                      | 1963663 | 1992214 | 28552  |                    |                     | ○                                 | Δ 063                      | 3391906 | 3405315 | 13410  | -                  |                     |                                   |   |
| Δ 011                      | 564277  | 608454  | 44178  |                    |                     | ○                                 | Δ 037                      | 1995801 | 2027348 | 31548  |                    |                     | ○                                 | Δ 064                      | 3411502 | 3421221 | 9720   |                    |                     |                                   | ○ |
| Δ 109                      | 616865  | 623504  | 6640   |                    | -                   |                                   | Δ 038                      | 2032588 | 2043515 | 10928  |                    |                     | ○                                 | Δ 080                      | 3486425 | 3496907 | 10483  |                    |                     |                                   | ○ |
| Δ 012                      | 675440  | 689710  | 14271  |                    |                     | ○                                 | Δ 039                      | 2068288 | 2081065 | 12778  |                    |                     | ○                                 | Δ 079                      | 3536154 | 3549688 | 13535  |                    |                     |                                   | ○ |
| Δ 013                      | 729157  | 739929  | 10773  |                    |                     | ○                                 | Δ 040                      | 2103532 | 2115203 | 11672  |                    |                     | ○                                 | Δ 078                      | 3556476 | 3576240 | 19765  |                    |                     |                                   | ○ |
| Δ 104                      | 793553  | 798837  | 5285   |                    |                     |                                   | Δ 041                      | 2145403 | 2186994 | 41592  |                    |                     | ○                                 | Δ 077                      | 3697303 | 3709528 | 12226  |                    |                     |                                   | ○ |
| Δ 014                      | 832889  | 848426  | 15538  |                    |                     | ○                                 | Δ 042                      | 2199808 | 2228989 | 29182  |                    |                     | ○                                 | Δ 076                      | 3730161 | 3746404 | 16244  | -                  |                     |                                   |   |
| Δ 015                      | 867975  | 883810  | 15836  |                    |                     | ○                                 | Δ 093                      | 2240080 | 2244979 | 4900   |                    |                     |                                   | Δ 075                      | 3762907 | 3772818 | 9912   |                    |                     |                                   | ○ |
| Δ 016                      | 891335  | 909716  | 18382  |                    |                     | ○                                 | Δ 088                      | 2255034 | 2262630 | 7597   |                    |                     | ○                                 | Δ 074                      | 3774085 | 3785258 | 11174  |                    |                     |                                   | ○ |
| Δ 017                      | 993702  | 1005264 | 11563  |                    | -                   |                                   | Δ 043                      | 2269579 | 2285727 | 16149  |                    |                     |                                   | Δ 073                      | 3832314 | 3847588 | 15275  |                    |                     |                                   |   |
| Δ 017*                     | 993702  | 997288  | 3587   |                    |                     |                                   | Δ 106                      | 2303383 | 2305962 | 2580   |                    |                     |                                   | Δ 073*                     | 3832370 | 3843413 | 11044  |                    |                     |                                   |   |
| Δ 018                      | 1049225 | 1097357 | 48133  |                    |                     | ○                                 | Δ K                        | 2324713 | 2339072 | 14360  |                    |                     |                                   | Δ 072                      | 3868669 | 3896674 | 28006  |                    |                     |                                   |   |
| Δ 089                      | 1127734 | 1142523 | 14790  |                    | -                   |                                   | Δ 044                      | 2366102 | 2378285 | 12184  |                    | -                   |                                   | Δ 071                      | 3900889 | 3915001 | 14113  | -                  |                     |                                   |   |
| Δ 090                      | 1180190 | 1191994 | 11805  |                    |                     |                                   | Δ 045                      | 2385401 | 2394610 | 9210   |                    |                     | ○                                 | Δ 070                      | 3932708 | 3991889 | 59182  |                    |                     |                                   |   |
| Δ 019                      | 1198444 | 1225484 | 27041  |                    |                     | ○                                 | Δ 046                      | 2422504 | 2433237 | 10734  |                    |                     | ○                                 | Δ 070*                     | 3932708 | 3970896 | 38189  |                    |                     |                                   |   |
| Δ 020                      | 1228177 | 1244657 | 16481  |                    | -                   |                                   | Δ 047                      | 2471991 | 2481621 | 9631   |                    |                     | ○                                 | Δ 069                      | 4003003 | 4021348 | 18346  |                    |                     |                                   | ○ |
| Δ 020*                     | 1228177 | 1231892 | 3716   |                    |                     |                                   | Δ 094                      | 2504214 | 2513696 | 9483   |                    |                     | ○                                 | Δ 068                      | 4040696 | 4062630 | 21935  |                    |                     |                                   |   |
| Δ 091                      | 1296040 | 1308865 | 12826  |                    |                     |                                   | Δ 048                      | 2550201 | 2558664 | 8464   |                    | -                   |                                   | Δ 068*                     | 4053129 | 4062630 | 9502   |                    |                     |                                   |   |
| Δ 021                      | 1353109 | 1367223 | 14115  |                    | -                   |                                   | Δ 107                      | 2552267 | 2556111 | 3845   |                    | -                   |                                   | Δ 066                      | 4066911 | 4105898 | 38988  | -                  |                     |                                   |   |
| Δ 022                      | 1371903 | 1437413 | 65511  |                    |                     |                                   | Δ 095                      | 2671911 | 2682709 | 10799  |                    |                     |                                   | Δ 065                      | 4170561 | 4186910 | 16350  |                    |                     |                                   | ○ |
| Δ 023                      | 1444765 | 1459211 | 14447  |                    |                     |                                   | Δ 050                      | 2754815 | 2788618 | 33804  |                    |                     | ○                                 | Δ 081                      | 4239494 | 4255870 | 16377  |                    |                     |                                   | ○ |
| Δ 024                      | 1463839 | 1483912 | 20074  |                    |                     |                                   | Δ 051                      | 2794312 | 2800028 | 5717   |                    |                     | ○                                 | Δ 082                      | 4303001 | 4316734 | 13734  |                    |                     |                                   | ○ |
| Δ 025                      | 1493425 | 1501185 | 7761   |                    |                     |                                   | Δ 096                      | 2803446 | 2809285 | 5840   |                    |                     | ○                                 | Δ 083                      | 4318541 | 4334945 | 16405  |                    |                     |                                   | ○ |
| Δ 026                      | 1503975 | 1537585 | 33611  |                    |                     |                                   | Δ 097                      | 2824452 | 2829398 | 4947   |                    |                     | ○                                 | Δ 084                      | 4414759 | 4428377 | 13619  |                    |                     |                                   | ○ |
| Δ 027                      | 1558830 | 1572320 | 13491  |                    |                     |                                   | Δ 052                      | 2875237 | 2886183 | 10947  |                    |                     |                                   | Δ 108                      | 4461354 | 4465751 | 4398   |                    |                     |                                   |   |
| Δ 028                      | 1574125 | 1607784 | 33660  | -                  |                     |                                   | Δ 053                      | 2890870 | 2905236 | 14367  |                    |                     |                                   | Δ 099                      | 4467771 | 4472020 | 4250   |                    |                     |                                   |   |
| Δ 029                      | 1624348 | 1640177 | 15830  | -                  |                     | ○                                 | Δ 100                      | 2909708 | 2910007 | 300    |                    |                     | ○                                 | Δ 085                      | 4501438 | 4514770 | 13333  |                    |                     |                                   | ○ |
| Δ 029*                     | 1630051 | 1640177 | 10127  |                    |                     |                                   | Δ 054                      | 2984498 | 3032266 | 47769  |                    |                     | ○                                 | Δ 086                      | 4523112 | 4604872 | 81761  |                    |                     |                                   | ○ |
| Δ 030                      | 1641771 | 1649361 | 7591   |                    |                     | ○                                 | Δ 098                      | 3076224 | 3078055 | 1832   |                    |                     | ○                                 |                            |         |         |        |                    |                     |                                   |   |

<sup>a</sup>Names of deletion units. Deletions that defined the end positions are indicated by large capitals at the ends of their names.

<sup>b</sup>Deletion clones that could not be obtained are indicated by minus signs (-).

<sup>c</sup>Deletion clones with worse growth in M9 minimal medium are indicated by minus signs (-).

<sup>d</sup>Deletions integrated to MGF-01 are indicated by circles.

## Supplemental Table 2. Components of deletion units.

|          | plan                                     | refined and fixed design <sup>a</sup> | integrated in MGF-01 <sup>b</sup> |
|----------|------------------------------------------|---------------------------------------|-----------------------------------|
| unit A   | <b>Δ 002_Δ 007_Δ 001</b>                 | same as plan                          | ○                                 |
| unit B   | <b>Δ 009_Δ 010_Δ 011</b>                 | same as plan                          | ○                                 |
| unit C   | <b>Δ 014_Δ 015_Δ 013_Δ 012_Δ 016</b>     | <b>Δ 014_Δ 015_Δ 016</b>              | ○                                 |
| unit D   | <b>Δ 022_Δ 024_Δ 021</b>                 | <b>Δ 022_Δ 024</b>                    |                                   |
| unit E   | <b>Δ 025_Δ 026_Δ 027</b>                 | <b>Δ 025_Δ 026</b>                    |                                   |
| unit F   | <b>Δ 029_Δ 030</b>                       | same as plan                          | ○                                 |
| unit G   | <b>Δ 032_Δ 033_Δ 034_Δ 092</b>           |                                       |                                   |
| unit H   | <b>Δ 036_Δ 037_Δ 038_Δ 039_Δ 040</b>     | same as plan                          | ○                                 |
| unit I   | <b>Δ 041_Δ 042_Δ 043_Δ 088_Δ 093</b>     | <b>Δ 041_Δ 042_Δ 043_Δ 088</b>        |                                   |
| unit I-2 |                                          | <b>Δ 041_Δ 042_Δ 088</b>              | ○                                 |
| unit J   | <b>Δ K_Δ 044_Δ 045_Δ 046_Δ 047_Δ 094</b> | <b>Δ 046_Δ 047_Δ 094</b>              | ○                                 |
| unit K   | <b>Δ 048_Δ 049</b>                       |                                       |                                   |
| unit L   | <b>Δ 050_Δ 051_Δ 096_Δ 097</b>           | same as plan                          | ○                                 |
| unit M   | <b>Δ 052_Δ 053_Δ 054</b>                 |                                       |                                   |
| unit N   | <b>Δ 059_Δ 060B_Δ 056B</b>               |                                       |                                   |
| unit O   | <b>Δ 064_Δ 065</b>                       |                                       |                                   |
| unit P   | <b>Δ 070_Δ 069_Δ 072_Δ 073</b>           |                                       |                                   |
| unit Q   | <b>Δ 074_Δ 075_Δ 077</b>                 | same as plan                          | ○                                 |
| unit R   | <b>Δ 078_Δ 079_Δ 080</b>                 | same as plan                          | ○                                 |
| unit S   | <b>Δ 082_Δ 083_Δ 081</b>                 | same as plan                          | ○                                 |
| unit T   | <b>Δ 085_Δ 086</b>                       | same as plan                          | ○                                 |

<sup>a</sup>Deletion unit clones which did not show good growth in M9 minimal medium showed changes their combinations of deletions from the plan. Clones that were constructed according to the plan are indicated in bold type.

<sup>b</sup>Deletions integrated to MGF-01 are indicated by circles.

## Supplemental Table 3. Composition of reduced genome strains.

| Gene product type                  | W 3110      | M GF-01     | $\Delta$ 16 | M S43       |
|------------------------------------|-------------|-------------|-------------|-------------|
| Enzyme                             | 1094        | 970         | 888         | 1014        |
| Enzyme, predicted                  | 390         | 300         | 266         | 334         |
| Transporter                        | 343         | 257         | 246         | 315         |
| Transporter, predicted             | 254         | 172         | 169         | 219         |
| Regulator                          | 243         | 191         | 167         | 218         |
| Regulator, predicted               | 164         | 110         | 110         | 137         |
| Membrane                           | 43          | 41          | 37          | 42          |
| Membrane, predicted                | 210         | 166         | 153         | 181         |
| Factor                             | 150         | 131         | 121         | 138         |
| Factor, predicted                  | 60          | 50          | 54          | 56          |
| Structural component               | 89          | 71          | 81          | 62          |
| Structural component, predicted    | 37          | 35          | 32          | 33          |
| Carrier                            | 77          | 70          | 50          | 74          |
| Carrier, predicted                 | 42          | 33          | 32          | 40          |
| Lipoprotein                        | 46          | 39          | 36          | 42          |
| Cell process                       | 56          | 50          | 53          | 49          |
| Leader peptide                     | 11          | 11          | 11          | 11          |
| Pseudogenes in common              | 74          | 30          | 44          | 44          |
| Phage/ $\Phi$ in common            | 310         | 81          | 117         | 19          |
| Phage/ $\Phi$ in common, predicted | 10          | 6           | 5           | 5           |
| Partial information                | 146         | 108         | 113         | 130         |
| Unknown function                   | 471         | 346         | 339         | 391         |
| No classification                  | 76          | 48          | 45          | 60          |
| <b>Total</b>                       | <b>4396</b> | <b>3316</b> | <b>3169</b> | <b>3614</b> |
| <b>Deleted gene</b>                | <b>0</b>    | <b>1080</b> | <b>1227</b> | <b>782</b>  |

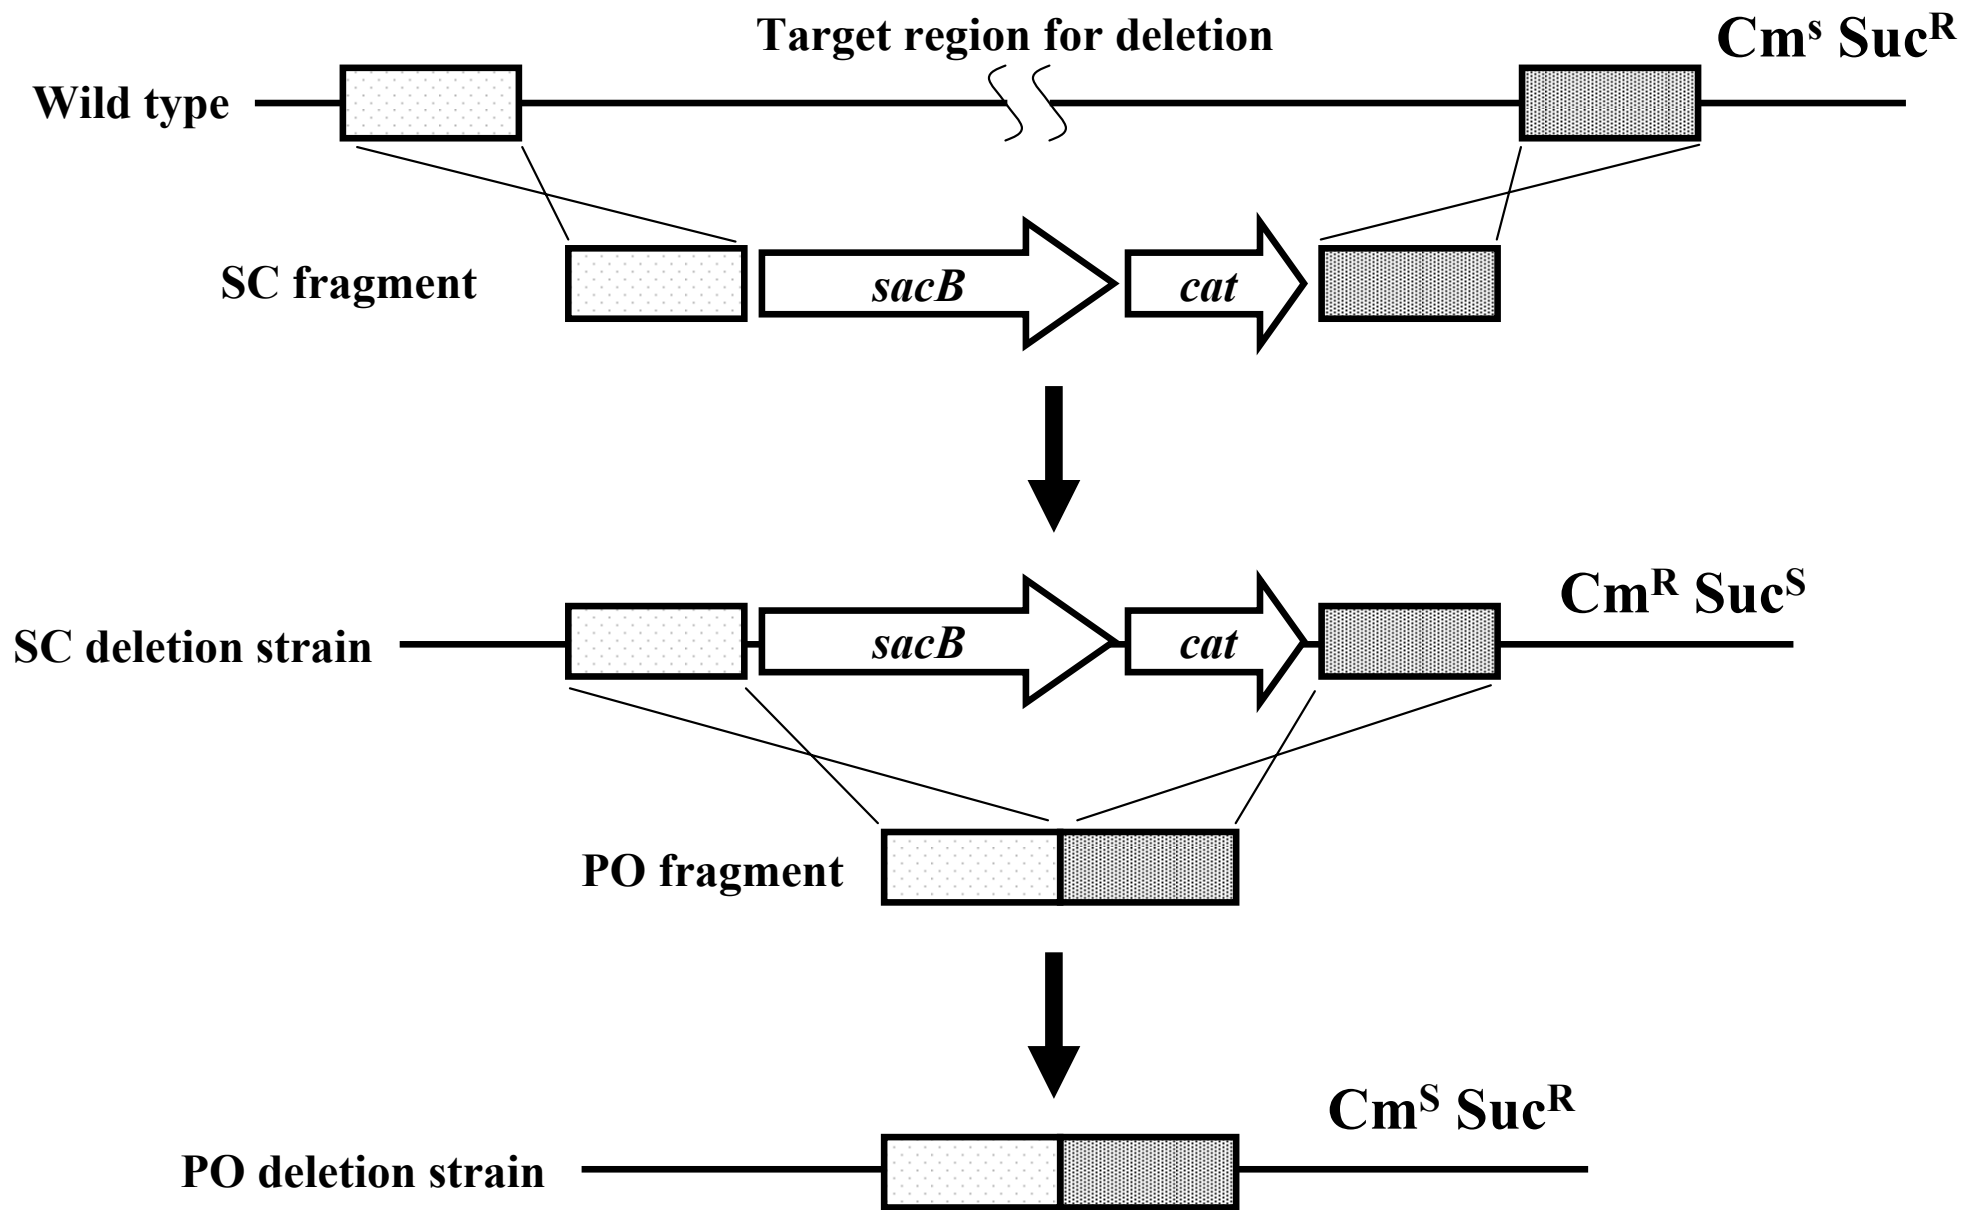

Supplement: dsn019_1.pdf [file dsn019_1.pdf]
